# Supplementary material for: Rhodamine B derivative-modified up-conversion nanoparticle probes based on fluorescence resonance energy transfer (FRET) for the solid-based detection of copper ions
Source: Royal Society of Chemistry journal article supplement (doi:10.1039/c9ra05504e), 2019-01-01
Supplement: c9ra05504e1.pdf [file c9ra05504e1.pdf]

Electronic Supplementary Material (ESI) for RSC Advances.  
This journal is © The Royal Society of Chemistry 2019

*Rhodamine B derivative-modified up-conversion nanoparticle probe based on fluorescence resonance energy transfer (FRET) for solid-based detection of copper ion*

Xiaoyan Liu,<sup>ac</sup> Nan Ding<sup>b</sup>, Jun Wang,<sup>c</sup> Honglan Chen,<sup>c</sup> Xinwei Chen,<sup>c</sup> Zhidong Wang,<sup>a</sup> and Xincun Peng<sup>\*a</sup>

<sup>a</sup>Engineering Research Center of Nuclear Technology Application, Ministry of Education, Engineering Research Center of New Energy Technology and Equipment of Jiangxi Province, East China Institute of Technology, 418 Guanglan Avenue, Nanchang 330013, China.

<sup>b</sup>State Key Laboratory on Integrated Optoelectronics, College of Electronic Science and Engineering, Jilin University, 2699 Qianjin Street, Changchun 130012, China.

<sup>c</sup>Institute for Electric Light Sources, School of Information Science and Technology, Engineering Research Center of Advanced Lighting Technology, and Academy of Engineering and Technology, Fudan University, Shanghai 200433, China.

\* Corresponding authors: Xincun Peng, xcpeng@ecit.cn

## Supplementary Information

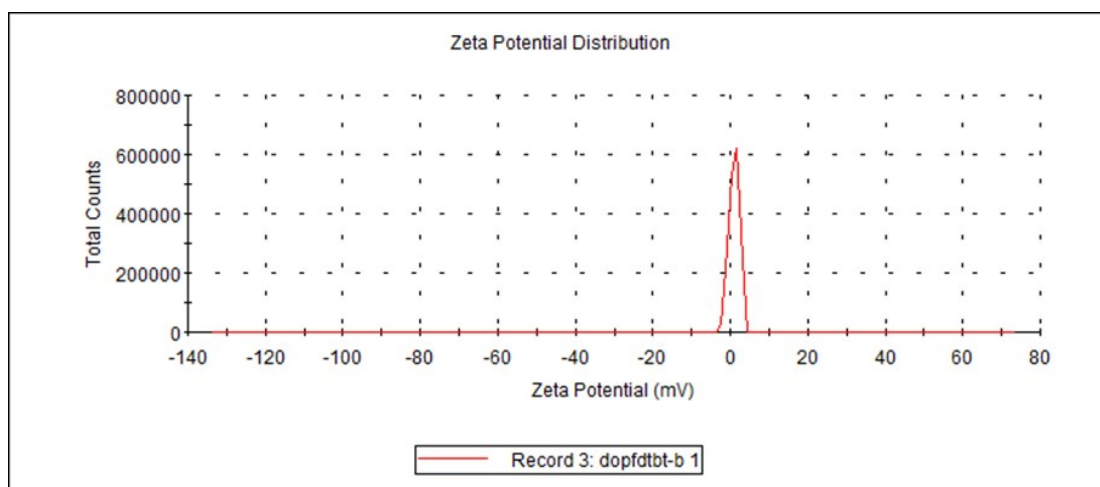

**Fig. S1**  $\zeta$ -potential of the RBH

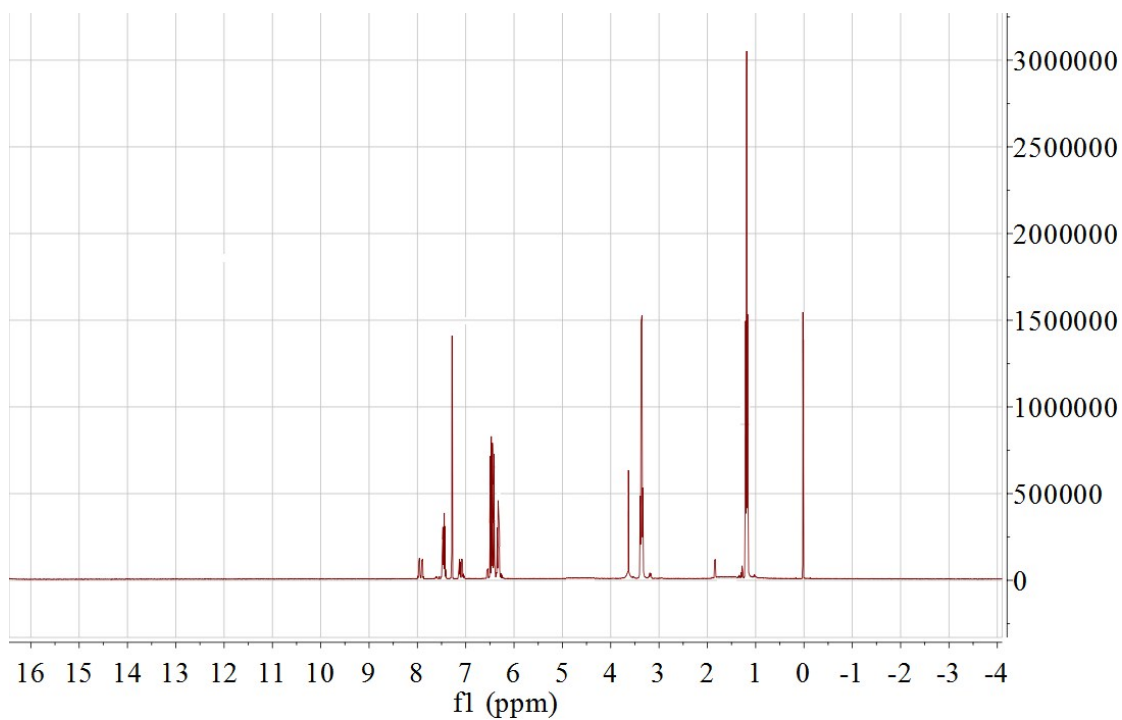

Fig. S2 <sup>1</sup>H NMR spectra of the RBH.

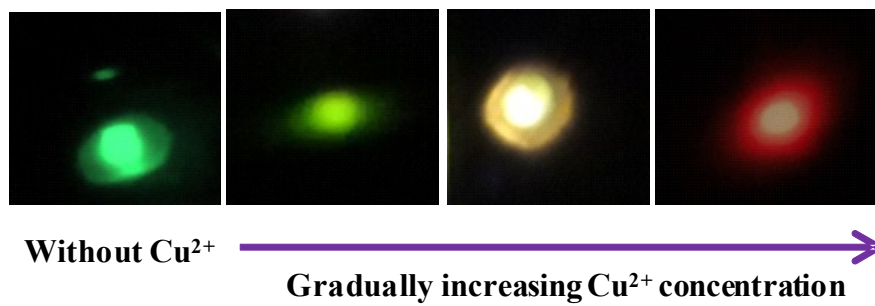

Fig. S3 color change of the RBH-UCNPs FRET sensors with increasing  $\text{Cu}^{2+}$  concentration.

The arrow represents the direction of increasing concentration.

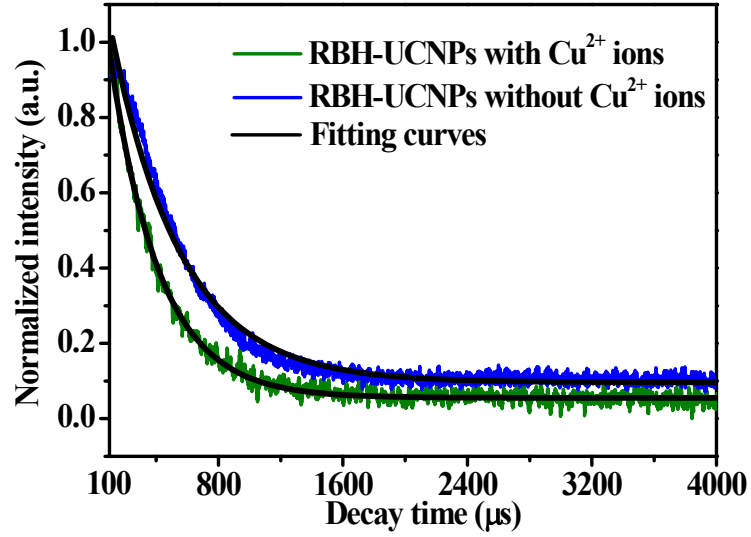

Fig.S4 Luminescent decay dynamic of  $^4S_{3/2} - ^4I_{15/2}$  of  $Er^{3+}$  transition in the absence and presence of  $Cu^{2+}$  ions. The black solid line is fitting curves, other curves are the measured data.

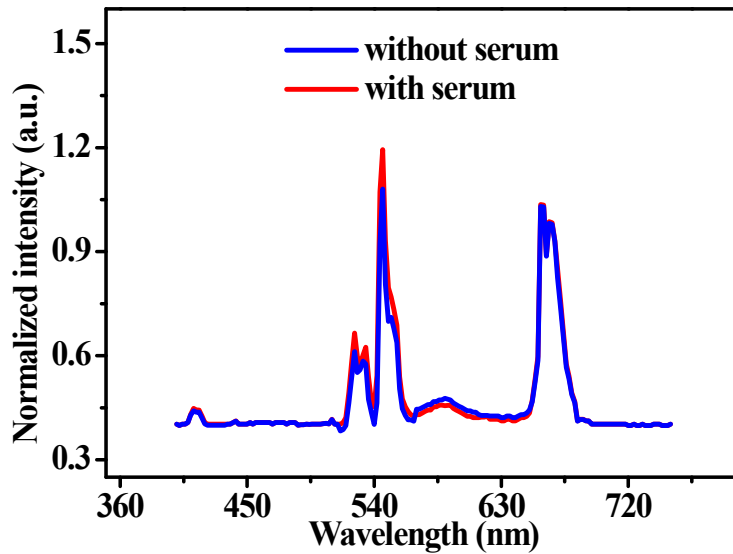

Fig. S5 Fluorescence intensity comparison in the absence and presence of the serum with the addition of the  $Cu^{2+}$  ions.
